# Supplementary material for: Plasmonic nanoparticle-embedded poly(p-phenylene benzobisoxazole) nanofibrous composite films for solar steam generation
Source: Royal Society of Chemistry journal article supplement (doi:10.1039/c8nr01017j), 2018-01-01
Supplement: c8nr01017j1.pdf [file c8nr01017j1.pdf]

## Supporting Information

### Plasmonic Nanoparticle-Embedded Poly(p-phenylene benzobisoxazole) Nanofibrous Composite Films for Solar Steam Generation

Meiling Chen,<sup>a</sup> Yufeng Wu,<sup>a</sup> Weixing Song,<sup>b</sup> Yuncheng Mo,<sup>a</sup> Xiankun Lin,<sup>a\*</sup> Qiang He,<sup>a\*</sup> and Bin Guo<sup>a</sup>

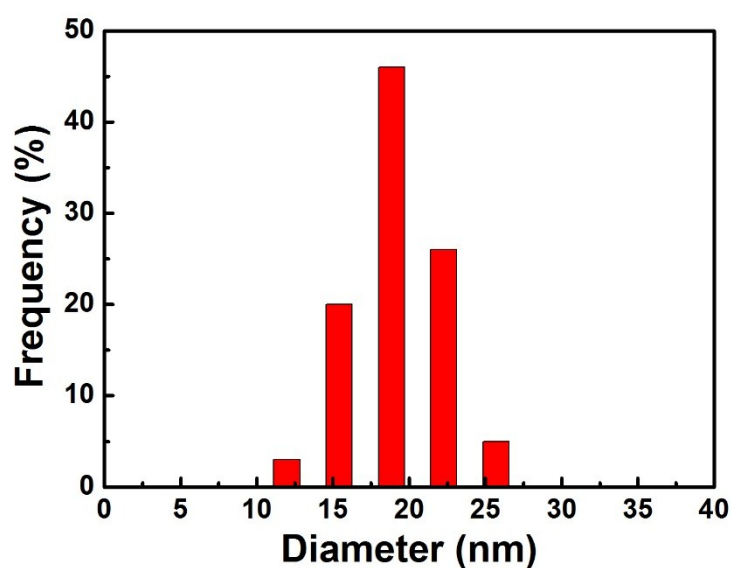

**Figure S1.** Statistical analysis of the diameters of PBO NFs, as determined from SEM images.

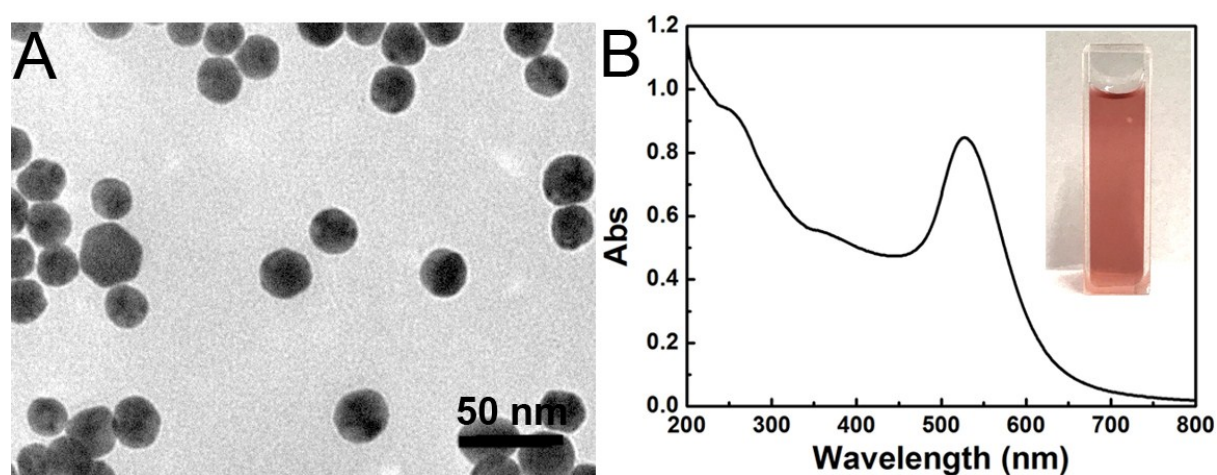

**Figure S2.** TEM image (A) and UV-vis absorption spectrum (B) of Au NPs. Inset in (B) is a digital photograph of the Au NP dispersion in water.
